# Supplementary material for: Generation of a Syngeneic Heterozygous ACVRL1(wt/mut) Knockout iPS Cell Line for the In Vitro Study of HHT2-Associated Angiogenesis
Source: MDPI journal article supplement (doi:10.3390/cells12121600), 2023-06-10

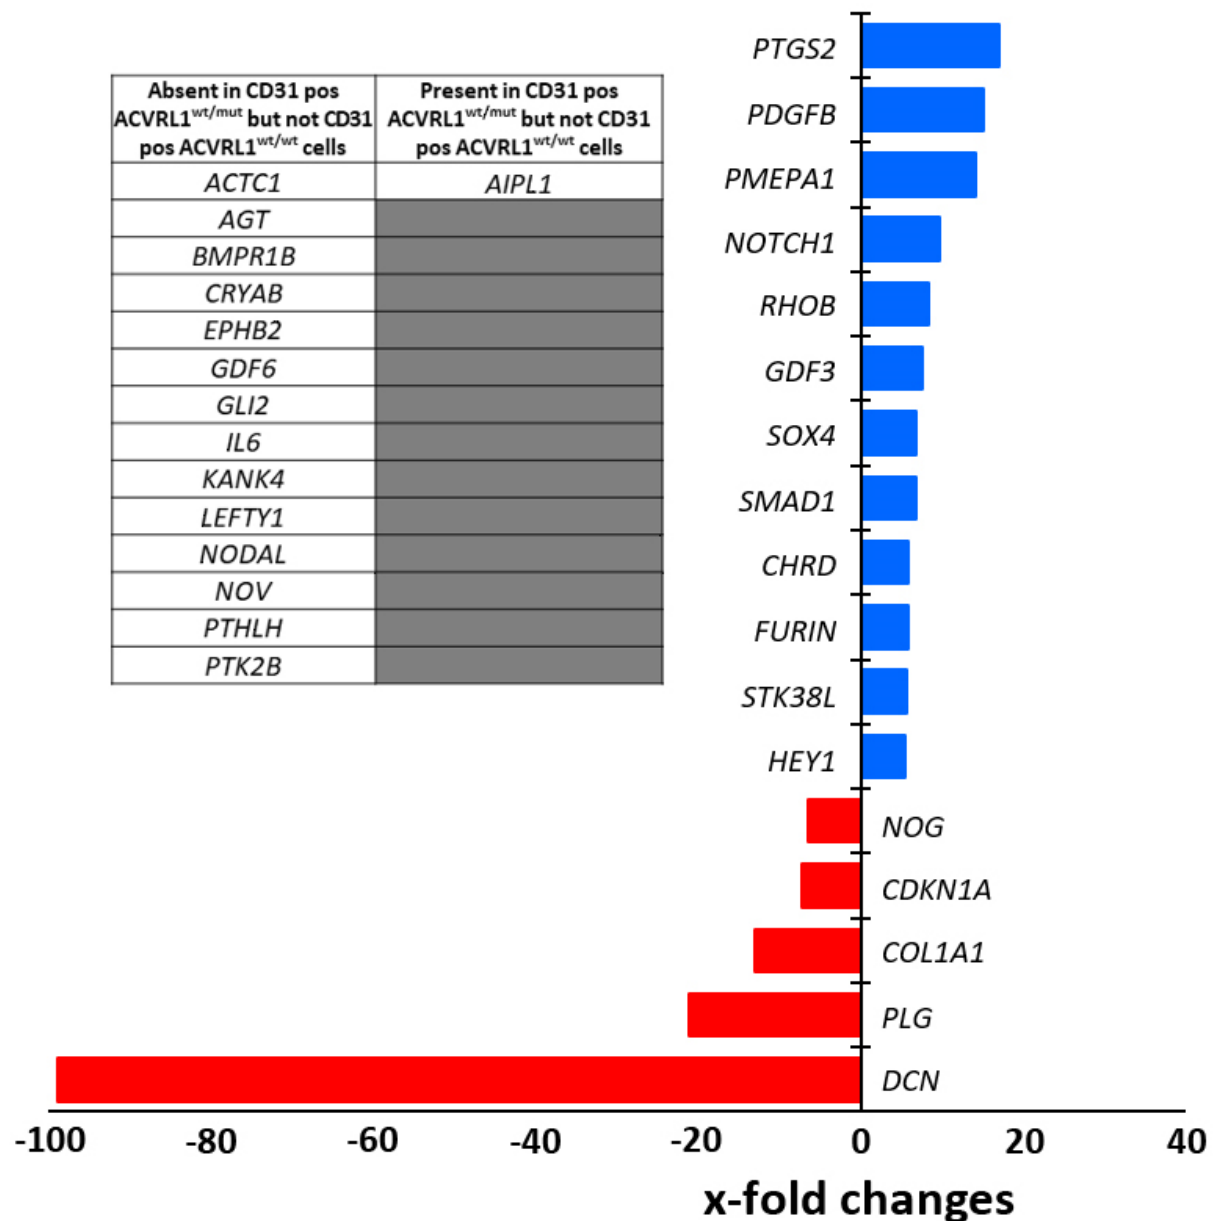

**Supplementary Figure S1. Differentially regulated genes in CD31+ cells isolated from ACVRL1<sup>wt/wt</sup> and ACVRL1<sup>wt/mut</sup> EBs.** Differences (> 5 fold) in mRNA expression between CD31+ cells derived from ACVRL1<sup>wt/wt</sup> and ACVRL1<sup>wt/mut</sup> EBs are depicted in the graph. The table summarizes mRNA expression of genes of the TGF-beta Signaling Pathway and associated targets present in CD31+ ACVRL1<sup>wt/wt</sup> but not in CD31+ ACVRL1<sup>wt/mut</sup> cells (absent) or exclusively present in CD31+ ACVRL1<sup>wt/mut</sup> cells (present). Abbreviations (includes only the regulated genes listed in the graph. For all other genes, see the gene list in the supplement): CDKN1A: Cyclin-dependent kinase inhibitor 1A (p21, Cip1) (NM\_000389); CHRD: Chordin (NM\_003741); COL1A1: Collagen, type I, alpha 1 (NM\_000088); DCN: Decorin (NM\_001920); FURIN: Furin (paired basic amino acid cleaving enzyme) (NM\_002569); GDF3: Growth differentiation factor 3 (NM\_020634); HEY1: Hairly/enhancer-of-split related with YRPW motif 1 (NM\_012258); NOG: Noggin (NM\_005450); NOTCH1: Notch 1 (NM\_017617); PDGFB: Platelet-derived growth factor beta polypeptide (NM\_002608); PMEPA1: Prostate transmembrane protein, androgen induced 1 (NM\_020182); PTGS2: Prostaglandin-endoperoxide synthase 2 (prostaglandin G/H synthase and cyclooxygenase) (NM\_000963); RHOB: Ras homolog gene family, member B (NM\_004040); SMAD1: SMAD family member 1 (NM\_005900); STK38L: Serine/threonine kinase 38 like (NM\_015000). The data is derived from a single experiment to demonstrate feasibility of gene analysis in MACS isolated CD31+ endothelial cells.

Table S1. Results of RT<sup>2</sup> Profiler PCR Array: Human TGF $\beta$  Signaling Pathway Plus (Qiagen® PAHS-035YA)

| Well | RefSeq       | Symbol    | AVG $\Delta$ Ct   |                  | 2 <sup><math>\Delta</math></sup> - $\Delta$ Ct |                  | fold change<br>ACVRL1-wt/mut<br>to wt/wt | t-test p<br>value | fold Up- or<br>Down-<br>Regulation<br>ACVRL1- wt/mut<br>to wt/wt |
|------|--------------|-----------|-------------------|------------------|------------------------------------------------|------------------|------------------------------------------|-------------------|------------------------------------------------------------------|
|      |              |           | ACVRL1-<br>wt/mut | ACVRL1-<br>wt/wt | ACVRL1-<br>wt/mut                              | ACVRL1-<br>wt/wt |                                          |                   |                                                                  |
| A01  | NM_001105    | ACVR1     | 5,692             | 5,116            | 0,019                                          | 0,029            | 0,671                                    | 0,069             | -1,491                                                           |
| A02  | NM_001616    | ACVR2A    | 5,249             | 4,933            | 0,026                                          | 0,033            | 0,803                                    | 0,082             | -1,246                                                           |
| A03  | NM_000020    | ACVRL1    | 10,384            | 11,902           | 0,001                                          | 0,000            | 2,862                                    | 0,198             | 2,862                                                            |
| A04  | NM_000479    | AMH       | 10,010            | 8,956            | 0,001                                          | 0,002            | 0,482                                    | 0,399             | -2,077                                                           |
| A05  | NM_020547    | AMHR2     | 12,378            | 10,419           | 0,000                                          | 0,001            | 0,257                                    | 0,301             | -3,886                                                           |
| A06  | NM_001675    | ATF4      | 0,187             | 0,362            | 0,879                                          | 0,778            | 1,129                                    | 0,294             | 1,129                                                            |
| A07  | NM_012342    | BAMBI     | 1,717             | 2,771            | 0,304                                          | 0,147            | 2,076                                    | 0,003             | 2,076                                                            |
| A08  | NM_199173    | BGLAP     | 5,647             | 6,025            | 0,020                                          | 0,015            | 1,300                                    | 0,264             | 1,300                                                            |
| A09  | NM_006129    | BMP1      | 6,333             | 6,062            | 0,012                                          | 0,015            | 0,828                                    | 0,315             | -1,207                                                           |
| A10  | NM_001200    | BMP2      | 6,404             | 6,666            | 0,012                                          | 0,010            | 1,199                                    | 0,614             | 1,199                                                            |
| A11  | NM_001201    | BMP3      | 10,623            | 11,114           | 0,001                                          | 0,000            | 1,405                                    | 0,263             | 1,405                                                            |
| A12  | NM_130851    | BMP4      | 5,886             | 6,303            | 0,017                                          | 0,013            | 1,335                                    | 0,062             | 1,335                                                            |
| B01  | NM_021073    | BMP5      | 10,022            | 11,049           | 0,001                                          | 0,000            | 2,038                                    | 0,350             | 2,038                                                            |
| B02  | NM_001718    | BMP6      | 7,569             | 8,001            | 0,005                                          | 0,004            | 1,350                                    | 0,493             | 1,350                                                            |
| B03  | NM_001719    | BMP7      | 3,915             | 3,946            | 0,066                                          | 0,065            | 1,022                                    | 0,828             | 1,022                                                            |
| B04  | NM_133468    | BMPER     | 6,643             | 7,088            | 0,010                                          | 0,007            | 1,361                                    | 0,373             | 1,361                                                            |
| B05  | NM_004329    | BMPR1A    | 2,876             | 2,712            | 0,136                                          | 0,153            | 0,893                                    | 0,037             | -1,120                                                           |
| B06  | NM_001203    | BMPR1B    | 9,381             | 9,214            | 0,001                                          | 0,002            | 0,891                                    | 0,691             | -1,122                                                           |
| B07  | NM_000389    | CDKN1A    | 2,305             | 3,234            | 0,202                                          | 0,106            | 1,905                                    | 0,561             | 1,905                                                            |
| B08  | NM_004064    | CDKN1B    | 4,848             | 4,789            | 0,035                                          | 0,036            | 0,960                                    | 0,713             | -1,042                                                           |
| B09  | NM_004936    | CDKN2B    | 11,431            | 10,865           | 0,000                                          | 0,001            | 0,676                                    | 0,908             | -1,480                                                           |
| B10  | NM_003741    | CHRD      | 8,765             | 7,668            | 0,002                                          | 0,005            | 0,468                                    | 0,289             | -2,138                                                           |
| B11  | NM_000088    | COL1A1    | 5,013             | 2,992            | 0,031                                          | 0,126            | 0,246                                    | 0,068             | -4,059                                                           |
| B12  | NM_000089    | COL1A2    | 3,008             | 2,975            | 0,124                                          | 0,127            | 0,978                                    | 0,783             | -1,023                                                           |
| C01  | NM_001920    | DCN       | 7,839             | 7,121            | 0,004                                          | 0,007            | 0,608                                    | 0,309             | -1,645                                                           |
| C02  | NM_001423    | EMP1      | 13,019            | 13,629           | 0,000                                          | 0,000            | 1,526                                    | 0,356             | 1,526                                                            |
| C03  | NM_000118    | ENG       | 7,516             | 7,490            | 0,005                                          | 0,006            | 0,982                                    | 0,782             | -1,018                                                           |
| C04  | NM_015675    | GADD45B   | 3,504             | 4,094            | 0,088                                          | 0,059            | 1,506                                    | 0,047             | 1,506                                                            |
| C05  | NM_016204    | GDF2      | 12,802            | 12,679           | 0,000                                          | 0,000            | 0,919                                    | 0,710             | -1,089                                                           |
| C06  | NM_020634    | GDF3      | 2,146             | 2,614            | 0,226                                          | 0,163            | 1,383                                    | 0,166             | 1,383                                                            |
| C07  | NM_000557    | GDF5      | 12,209            | 13,446           | 0,000                                          | 0,000            | 2,357                                    | 0,116             | 2,357                                                            |
| C08  | NM_001001557 | GDF6      | 9,940             | 10,398           | 0,001                                          | 0,001            | 1,373                                    | 0,351             | 1,373                                                            |
| C09  | NM_182828    | GDF7      | 10,232            | 11,176           | 0,001                                          | 0,000            | 1,924                                    | 0,056             | 1,924                                                            |
| C10  | NM_173849    | GSC       | 5,742             | 5,032            | 0,019                                          | 0,031            | 0,611                                    | 0,528             | -1,636                                                           |
| C11  | NM_014685    | HERPUD1   | 5,685             | 5,698            | 0,019                                          | 0,019            | 1,009                                    | 0,917             | 1,009                                                            |
| C12  | NM_002165    | ID1       | 2,015             | 1,822            | 0,247                                          | 0,283            | 0,875                                    | 0,515             | -1,143                                                           |
| D01  | NM_002166    | ID2       | 2,013             | 3,555            | 0,248                                          | 0,085            | 2,912                                    | 0,004             | 2,912                                                            |
| D02  | NM_001550    | IFRD1     | 5,065             | 4,312            | 0,030                                          | 0,050            | 0,593                                    | 0,208             | -1,685                                                           |
| D03  | NM_000618    | IGF1      | 12,004            | 12,222           | 0,000                                          | 0,000            | 1,163                                    | 0,523             | 1,163                                                            |
| D04  | NM_000598    | IGFBP3    | 6,785             | 6,236            | 0,009                                          | 0,013            | 0,684                                    | 0,027             | -1,462                                                           |
| D05  | NM_000600    | IL6       | 9,400             | 8,812            | 0,001                                          | 0,002            | 0,666                                    | 0,267             | -1,503                                                           |
| D06  | NM_002191    | INHA      | 9,252             | 9,448            | 0,002                                          | 0,001            | 1,146                                    | 0,931             | 1,146                                                            |
| D07  | NM_020997    | LEFTY1    | 3,469             | 2,156            | 0,090                                          | 0,224            | 0,403                                    | 0,567             | -2,484                                                           |
| D08  | NM_000627    | LTBP1     | 2,967             | 3,402            | 0,128                                          | 0,095            | 1,352                                    | 0,076             | 1,352                                                            |
| D09  | NM_002467    | MYC V-myc | 1,962             | 2,803            | 0,257                                          | 0,143            | 1,792                                    | 0,135             | 1,792                                                            |
| D10  | NM_018055    | NODAL     | 3,223             | 2,273            | 0,107                                          | 0,207            | 0,518                                    | 0,312             | -1,931                                                           |
| D11  | NM_005450    | NOG       | 6,388             | 8,188            | 0,012                                          | 0,003            | 3,483                                    | 0,057             | 3,483                                                            |
| D12  | NM_002608    | PDGFB     | 7,970             | 8,911            | 0,004                                          | 0,002            | 1,920                                    | 0,523             | 1,920                                                            |
| E01  | NM_002658    | PLAU      | 3,985             | 4,834            | 0,063                                          | 0,035            | 1,801                                    | 0,049             | 1,801                                                            |
| E02  | NM_005900    | SMAD1     | 4,807             | 4,436            | 0,036                                          | 0,046            | 0,773                                    | 0,275             | -1,294                                                           |
| E03  | NM_005901    | SMAD2     | 3,143             | 2,936            | 0,113                                          | 0,131            | 0,867                                    | 0,040             | -1,154                                                           |

|     |           |          |        |        |        |        |       |       |        |
|-----|-----------|----------|--------|--------|--------|--------|-------|-------|--------|
| E04 | NM_005902 | SMAD3    | 8,704  | 7,364  | 0,002  | 0,006  | 0,395 | 0,209 | -2,531 |
| E05 | NM_005359 | SMAD4    | 3,879  | 3,491  | 0,068  | 0,089  | 0,764 | 0,014 | -1,309 |
| E06 | NM_005903 | SMAD5    | 3,561  | 3,309  | 0,085  | 0,101  | 0,840 | 0,031 | -1,191 |
| E07 | NM_005904 | SMAD7    | 3,638  | 3,221  | 0,080  | 0,107  | 0,749 | 0,153 | -1,334 |
| E08 | NM_020429 | SMURF1   | 5,097  | 4,512  | 0,029  | 0,044  | 0,666 | 0,002 | -1,501 |
| E09 | NM_007315 | STAT1    | 3,854  | 3,728  | 0,069  | 0,075  | 0,916 | 0,031 | -1,091 |
| E10 | NM_000660 | TGFB1    | 4,246  | 4,120  | 0,053  | 0,058  | 0,917 | 0,574 | -1,091 |
| E11 | NM_015927 | TGFB11   | 8,494  | 8,046  | 0,003  | 0,004  | 0,733 | 0,064 | -1,365 |
| E12 | NM_003238 | TGFB2    | 7,446  | 7,801  | 0,006  | 0,004  | 1,279 | 0,398 | 1,279  |
| F01 | NM_003239 | TGFB3    | 9,476  | 9,189  | 0,001  | 0,002  | 0,819 | 0,643 | -1,221 |
| F02 | NM_000358 | TGFB1    | 6,216  | 7,298  | 0,013  | 0,006  | 2,118 | 0,064 | 2,118  |
| F03 | NM_004612 | TGFB1    | 4,340  | 4,147  | 0,049  | 0,056  | 0,875 | 0,407 | -1,143 |
| F04 | NM_003242 | TGFB2    | 6,236  | 5,749  | 0,013  | 0,019  | 0,714 | 0,010 | -1,401 |
| F05 | NM_003243 | TGFB3    | 7,165  | 7,446  | 0,007  | 0,006  | 1,214 | 0,152 | 1,214  |
| F06 | NM_003244 | TGIF1    | 2,235  | 1,926  | 0,212  | 0,263  | 0,808 | 0,001 | -1,238 |
| F07 | NM_003246 | THBS1    | 4,490  | 3,738  | 0,045  | 0,075  | 0,594 | 0,090 | -1,685 |
| F08 | NM_003810 | TNFSF10  | 10,012 | 9,343  | 0,001  | 0,002  | 0,629 | 0,117 | -1,591 |
| F09 | NM_005159 | ACTC1    | 7,072  | 4,948  | 0,007  | 0,032  | 0,230 | 0,004 | -4,356 |
| F10 | NM_001204 | BMP2     | 4,249  | 4,355  | 0,053  | 0,049  | 1,076 | 0,253 | 1,076  |
| F11 | NM_000399 | EGR2     | 9,158  | 8,682  | 0,002  | 0,002  | 0,719 | 0,205 | -1,392 |
| F12 | NM_000043 | FAS      | 7,910  | 7,441  | 0,004  | 0,006  | 0,722 | 0,287 | -1,385 |
| G01 | NM_002006 | FGF2     | 3,386  | 2,331  | 0,096  | 0,199  | 0,481 | 0,105 | -2,078 |
| G02 | NM_005860 | FSTL3    | 8,542  | 8,225  | 0,003  | 0,003  | 0,803 | 0,546 | -1,245 |
| G03 | NM_002229 | JUNB     | 6,539  | 6,885  | 0,011  | 0,008  | 1,271 | 0,280 | 1,271  |
| G04 | NM_181712 | KANK4    | 9,016  | 9,558  | 0,002  | 0,001  | 1,456 | 0,398 | 1,456  |
| G05 | NM_017644 | KLHL24   | 3,952  | 4,983  | 0,065  | 0,032  | 2,044 | 0,049 | 2,044  |
| G06 | NM_002514 | NOV      | 10,857 | 10,207 | 0,001  | 0,001  | 0,637 | 0,104 | -1,569 |
| G07 | NM_020182 | PMEPA1   | 4,910  | 4,602  | 0,033  | 0,041  | 0,808 | 0,410 | -1,238 |
| G08 | NM_000602 | SERPINE1 | 6,112  | 5,602  | 0,014  | 0,021  | 0,702 | 0,361 | -1,424 |
| G09 | NM_005585 | SMAD6    | 7,592  | 7,658  | 0,005  | 0,005  | 1,047 | 0,987 | 1,047  |
| G10 | NM_003107 | SOX4     | 4,208  | 3,839  | 0,054  | 0,070  | 0,774 | 0,200 | -1,292 |
| G11 | NM_015000 | STK38L   | 3,976  | 3,686  | 0,064  | 0,078  | 0,818 | 0,116 | -1,223 |
| G12 | NM_032873 | UBASH3B  | 4,505  | 6,189  | 0,044  | 0,014  | 3,212 | 0,069 | 3,212  |
| H01 | NM_001101 | ACTB     | -4,107 | -4,364 | 17,235 | 20,593 | 0,837 | 0,050 | -1,195 |
| H02 | NM_004048 | B2M      | 2,166  | 2,259  | 0,223  | 0,209  | 1,067 | 0,503 | 1,067  |
| H03 | NM_002046 | GAPDH    | -2,707 | -2,589 | 6,530  | 6,015  | 1,086 | 0,376 | 1,086  |
| H04 | NM_000194 | HPRT1    | 4,654  | 3,991  | 0,040  | 0,063  | 0,631 | 0,001 | -1,584 |
| H05 | NM_001002 | RPLP0    | -4,113 | -3,662 | 17,301 | 12,654 | 1,367 | 0,003 | 1,367  |

Listed here are the complete data from the Qiagen® PAHS-035YA array (Cat. No. 330231). The analysis includes n=3 independent mounts of iPSC ACVRL1<sup>wt/wt</sup> and iPSC ACVRL1<sup>wt/mut</sup>, respectively. Regulation is expressed as change in expression of iPSC ACVRL1<sup>wt/mut</sup> compared with iPSC ACVRL1<sup>wt/wt</sup>. Abbreviations of symbols in alphabetical order: ACTB: Actin, beta; ACTC1: Actin, alpha, cardiac muscle 1; ACVR: Activin A receptor (type I, IIA); AMH: Anti-Mullerian hormone; AMHR2: Anti-Mullerian hormone receptor, type II; ATF4: Activating transcription factor 4 (tax-responsive enhancer element B67); B2M: Beta-2-microglobulin; BAMBI: BMP and activin membrane-bound inhibitor homolog (*Xenopus laevis*); BGLAP: Bone gamma-carboxyglutamate (gla) protein; BMP: Bone morphogenetic protein (1, 2, 3, 4, 5, 6, 7); BMPER: BMP binding endothelial regulator; BMPR: Bone morphogenetic protein receptor (type IA, IB, 2); CDKN: Cyclin-dependent kinase inhibitor (1A (p21, Cip1), 1B (p27, Kip1) 2B (p15, inhibits CDK4)); CHRDL: Chordin; COL1A: Collagen, type I, alpha (1, 2); DCN: Decorin; EGR2: Early growth response 2; nEMP1: Epithelial membrane protein 1; ENG: Endoglin; FAS: Fas (TNF receptor superfamily, member 6); FGF2: Fibroblast growth factor 2 (basic); FSTL3: Follistatin-like 3 (secreted glycoprotein); GADD45B: Growth arrest and DNA-damage-inducible, beta; GDF: Growth differentiation factor (2, 3, 5, 6, 7); GAPDH: Glyceraldehyde-3-phosphate dehydrogenase; GSC: Goosecoid homeobox; HPRT1: Hypoxanthine phosphoribosyltransferase 1; HERPUD1: Homocysteine-inducible, endoplasmic reticulum stress-inducible, ubiquitin-like domain member 1; ID1/2 : Inhibitor

of DNA binding 1/2 dominant negative helix-loop-helix protein; IFRD1: Interferon-related developmental regulator 1; IGF1: Insulin-like growth factor 1 (somatomedin C); IGFBP3: Insulin-like growth factor binding protein 3; IL6: Interleukin 6 (interferon, beta 2); INHA: Inhibin, alpha; JUNB: Jun B proto-oncogene; KANK4: KN motif and ankyrin repeat domains 4; KLHL24: Kelch-like 24 (Drosophila); LEFTY1: Left-right determination factor 1; LTBP1: Latent transforming growth factor beta binding protein; MYC V-myc: myelocytomatosis viral oncogene homolog (avian); NODAL: Nodal homolog (mouse); NOG: Noggin; NOV: Nephroblastoma overexpressed gene; PDGFB: Platelet-derived growth factor beta polypeptide; PLAU: Plasminogen activator, urokinase; PMEPA1: Prostate transmembrane protein, androgen induced 1; RPLP0: Ribosomal protein, large, P0; SMAD: SMAD family member (1, 2, 3, 4, 5, 7); SMURF1: specific E3 ubiquitin protein ligase 1; STAT1: Signal transducer and activator of transcription 1, 91kDa; TGFB1: Transforming growth factor, beta 1;TGFB1I1: Transforming growth factor beta 1 induced transcript 1; TGFB: Transforming growth factor, beta (2, 3); TGFB1: Transforming growth factor, beta-induced, 68kDa;TGFB1R: Transforming growth factor, beta receptor (1, 2 (II (70/80kDa)), 3 (III)); TGIF1: TGFB-induced factor homeobox 1; THBS1: Thrombospondin 1; TNFSF10: Tumor necrosis factor (ligand) superfamily, member 10; SERPINE1: Serpin peptidase inhibitor, clade E (nexin, plasminogen activator inhibitor type1), member 1; SMAD6: SMAD family member 6; SOX4: SRY (sex determining region Y)-box 4; STK38L: Serine/threonine kinase 38 like; UBASH3B: Ubiquitin associated and SH3 domain containing B

Table S2. Results of RT<sup>2</sup> Profiler PCR Array: Human TGF $\beta$  Signaling Targets (Qiagen® PAHS-235ZA)

| Well | RefSeq    | Symbol  | AVG $\Delta$ Ct |              | 2 <sup><math>\Delta</math></sup> Ct |              | fold change | t-test p value | fold Up- or Down-Regulation |
|------|-----------|---------|-----------------|--------------|-------------------------------------|--------------|-------------|----------------|-----------------------------|
|      |           |         | ACVRL1-wt/mut   | ACVRL1-wt/wt | ACVRL1-wt/mut                       | ACVRL1-wt/wt |             |                |                             |
| A01  | NM_001613 | ACTA2   | 6,934           | 8,072        | 0,008                               | 0,004        | 2,202       | 0,068          | 2,202                       |
| A02  | NM_001105 | ACVR1   | 5,571           | 5,032        | 0,021                               | 0,031        | 0,689       | 0,024          | -1,452                      |
| A03  | NM_000020 | ACVRL1  | 11,351          | 10,498       | 0,000                               | 0,001        | 0,553       | 0,803          | -1,807                      |
| A04  | NM_000029 | AGT     | 12,761          | 12,886       | 0,000                               | 0,000        | 1,091       | 0,919          | 1,091                       |
| A05  | NM_014336 | AIPL1   | 11,071          | 10,954       | 0,000                               | 0,001        | 0,922       | 0,595          | -1,085                      |
| A06  | NM_000044 | AR      | 5,910           | 5,446        | 0,017                               | 0,023        | 0,725       | 0,220          | -1,380                      |
| A07  | NM_001674 | ATF3    | 3,997           | 5,685        | 0,063                               | 0,019        | 3,221       | 0,006          | 3,221                       |
| A08  | NM_001675 | ATF4    | -0,111          | 0,076        | 1,080                               | 0,949        | 1,138       | 0,327          | 1,138                       |
| A09  | NM_001186 | BACH1   | 3,485           | 3,315        | 0,089                               | 0,101        | 0,889       | 0,371          | -1,125                      |
| A10  | NM_138578 | BCL2L1  | 5,426           | 4,227        | 0,023                               | 0,053        | 0,436       | 0,002          | -2,296                      |
| A11  | NM_001709 | BDNF    | 9,685           | 9,301        | 0,001                               | 0,002        | 0,767       | 0,437          | -1,304                      |
| A12  | NM_003670 | BHLHE40 | 3,968           | 5,238        | 0,064                               | 0,027        | 2,410       | 0,074          | 2,410                       |
| B01  | NM_005104 | BRD2    | 3,517           | 3,116        | 0,087                               | 0,115        | 0,758       | 0,034          | -1,320                      |
| B02  | NM_001254 | CDC6    | 2,691           | 2,406        | 0,155                               | 0,189        | 0,821       | 0,176          | -1,218                      |
| B03  | NM_004064 | CDKN1B  | 4,867           | 4,723        | 0,034                               | 0,038        | 0,905       | 0,520          | -1,105                      |
| B04  | NM_005194 | CEBPB   | 6,058           | 5,041        | 0,015                               | 0,030        | 0,494       | 0,001          | -2,024                      |
| B05  | NM_004379 | CREB1   | 4,494           | 4,091        | 0,044                               | 0,059        | 0,756       | 0,007          | -1,322                      |
| B06  | NM_004380 | CREBBP  | 4,909           | 4,512        | 0,033                               | 0,044        | 0,760       | 0,033          | -1,316                      |
| B07  | NM_001885 | CRYAB   | 10,072          | 8,400        | 0,001                               | 0,003        | 0,314       | 0,001          | -3,187                      |
| B08  | NM_001904 | CTNNA1  | 2,563           | 2,134        | 0,169                               | 0,228        | 0,743       | 0,332          | -1,346                      |
| B09  | NM_001539 | DNAJA1  | 0,601           | 0,141        | 0,659                               | 0,907        | 0,727       | 0,041          | -1,376                      |
| B10  | NM_001950 | E2F4    | 4,017           | 3,238        | 0,062                               | 0,106        | 0,583       | 0,001          | -1,716                      |
| B11  | NM_001423 | EMP1    | 12,457          | to l. v.     | 0,000                               | s. i.        | no s. p.    | no s. p.       | no s. p.                    |
| B12  | NM_000118 | ENG     | 7,591           | 7,389        | 0,005                               | 0,006        | 0,869       | 0,476          | -1,150                      |
| C01  | NM_001429 | EP300   | 3,606           | 2,733        | 0,082                               | 0,150        | 0,546       | 0,000          | -1,833                      |
| C02  | NM_004442 | EPHB2   | 6,481           | 6,028        | 0,011                               | 0,015        | 0,731       | 0,230          | -1,369                      |
| C03  | NM_002026 | FN1     | 0,385           | 0,957        | 0,766                               | 0,515        | 1,487       | 0,156          | 1,487                       |
| C04  | NM_005252 | FOS     | 4,246           | 4,369        | 0,053                               | 0,048        | 1,088       | 0,598          | 1,088                       |
| C05  | NM_002569 | FURIN   | 4,825           | 4,430        | 0,035                               | 0,046        | 0,760       | 0,015          | -1,315                      |
| C06  | NM_015675 | GADD45B | 3,253           | 4,054        | 0,105                               | 0,060        | 1,742       | 0,025          | 1,742                       |
| C07  | NM_005270 | GLI2    | 7,800           | 6,574        | 0,004                               | 0,010        | 0,428       | 0,005          | -2,338                      |
| C08  | NM_001518 | GTF2I   | 0,350           | 0,178        | 0,784                               | 0,884        | 0,888       | 0,316          | -1,127                      |
| C09  | NM_014685 | HERPUD1 | 5,490           | 5,569        | 0,022                               | 0,021        | 1,056       | 0,856          | 1,056                       |
| C10  | NM_005524 | HES1    | 3,345           | 3,951        | 0,098                               | 0,065        | 1,522       | 0,317          | 1,522                       |
| C11  | NM_012258 | HEY1    | 6,706           | 6,929        | 0,010                               | 0,008        | 1,168       | 0,803          | 1,168                       |
| C12  | NM_002133 | HMOX1   | 5,917           | 5,399        | 0,017                               | 0,024        | 0,698       | 0,697          | -1,432                      |
| D01  | NM_002165 | ID1     | 1,933           | 1,826        | 0,262                               | 0,282        | 0,929       | 0,705          | -1,077                      |
| D02  | NM_002166 | ID2     | 2,079           | 3,696        | 0,237                               | 0,077        | 3,067       | 0,004          | 3,067                       |
| D03  | NM_002167 | ID3     | 1,307           | 1,512        | 0,404                               | 0,351        | 1,153       | 0,373          | 1,153                       |
| D04  | NM_001550 | IFRD1   | 4,975           | 4,227        | 0,032                               | 0,053        | 0,595       | 0,225          | -1,680                      |
| D05  | NM_000572 | IL10    | 12,520          | 13,201       | 0,000                               | 0,000        | 1,603       | 0,109          | 1,603                       |
| D06  | NM_005655 | KLF10   | 4,240           | 4,277        | 0,053                               | 0,052        | 1,026       | 0,686          | 1,026                       |
| D07  | NM_003188 | MAP3K7  | 3,519           | 3,536        | 0,087                               | 0,086        | 1,012       | 0,939          | 1,012                       |
| D08  | NM_001315 | MAPK14  | 4,433           | 3,861        | 0,046                               | 0,069        | 0,673       | 0,069          | -1,486                      |
| D09  | NM_002750 | MAPK8   | 4,015           | 3,867        | 0,062                               | 0,069        | 0,903       | 0,298          | -1,108                      |
| D10  | NM_015844 | MBD1    | 5,523           | 4,673        | 0,022                               | 0,039        | 0,555       | 0,000          | -1,803                      |
| D11  | NM_004530 | MMP2    | 4,117           | 3,707        | 0,058                               | 0,077        | 0,753       | 0,027          | -1,328                      |
| D12  | NM_002449 | MSX2    | 6,300           | 7,143        | 0,013                               | 0,007        | 1,794       | 0,140          | 1,794                       |
| E01  | NM_002467 | MYC     | 1,833           | 1,963        | 0,281                               | 0,256        | 1,095       | 0,482          | 1,095                       |
| E02  | NM_002478 | MYOD1   | 12,911          | 13,279       | 0,000                               | 0,000        | 1,291       | 0,506          | 1,291                       |
| E03  | NM_005596 | NFIB    | 6,365           | 6,320        | 0,012                               | 0,013        | 0,970       | 0,818          | -1,031                      |

|     |           |          |          |          |        |        |          |          |          |
|-----|-----------|----------|----------|----------|--------|--------|----------|----------|----------|
| E04 | NM_020529 | NFKBIA   | 3,609    | 3,975    | 0,082  | 0,064  | 1,289    | 0,265    | 1,289    |
| E05 | NM_017617 | NOTCH1   | 4,768    | 4,241    | 0,037  | 0,053  | 0,694    | 0,014    | -1,441   |
| E06 | NM_002607 | PDGFA    | 0,857    | 1,042    | 0,552  | 0,486  | 1,137    | 0,509    | 1,137    |
| E07 | NM_000301 | PLG      | n. d.    | 13,302   | absent | 0,000  | no s. p. | no s. p. | no s. p. |
| E08 | NM_005036 | PPARA    | 6,111    | 6,368    | 0,014  | 0,012  | 1,195    | 0,747    | 1,195    |
| E09 | NM_000963 | PTGS2    | 11,019   | 10,718   | 0,000  | 0,001  | 0,811    | 0,210    | -1,232   |
| E10 | NM_002820 | PTHLH    | 12,639   | 11,325   | 0,000  | 0,000  | 0,402    | 0,168    | -2,487   |
| E11 | NM_005607 | PTK2     | 2,597    | 2,686    | 0,165  | 0,155  | 1,064    | 0,711    | 1,064    |
| E12 | NM_004103 | PTK2B    | 9,307    | 9,493    | 0,002  | 0,001  | 1,138    | 0,544    | 1,138    |
| F01 | NM_006265 | RAD21    | 1,706    | 1,506    | 0,306  | 0,352  | 0,870    | 0,131    | -1,149   |
| F02 | NM_000964 | RARA     | 5,408    | 4,774    | 0,024  | 0,037  | 0,644    | 0,037    | -1,552   |
| F03 | NM_002895 | RBL1     | 6,501    | 5,358    | 0,011  | 0,024  | 0,453    | 0,023    | -2,208   |
| F04 | NM_001664 | RHOA     | 0,824    | 1,222    | 0,565  | 0,429  | 1,318    | 0,037    | 1,318    |
| F05 | NM_004040 | RHOB     | 4,015    | 3,869    | 0,062  | 0,068  | 0,904    | 0,612    | -1,107   |
| F06 | NM_001754 | RUNX1    | 9,024    | 8,912    | 0,002  | 0,002  | 0,925    | 0,819    | -1,081   |
| F07 | NM_012234 | RYBP     | 3,588    | to l. v. | 0,083  | s. i.  | no s. p. | no s. p. | no s. p. |
| F08 | NM_002964 | S100A8   | to l. v. | n. d.    | s. i.  | absent | no s. p. | no s. p. | no s. p. |
| F09 | NM_000602 | SERPINE1 | 5,918    | 5,280    | 0,017  | 0,026  | 0,643    | 0,195    | -1,556   |
| F10 | NM_000193 | SHH      | 10,104   | 10,006   | 0,001  | 0,001  | 0,935    | 0,802    | -1,070   |
| F11 | NM_005900 | SMAD1    | 4,467    | 4,243    | 0,045  | 0,053  | 0,856    | 0,239    | -1,168   |
| F12 | NM_005902 | SMAD3    | 12,702   | 9,712    | 0,000  | 0,001  | 0,126    | 0,317    | -7,940   |
| G01 | NM_005903 | SMAD5    | 3,469    | 3,065    | 0,090  | 0,119  | 0,756    | 0,001    | -1,323   |
| G02 | NM_005585 | SMAD6    | 7,326    | 7,329    | 0,006  | 0,006  | 1,002    | 0,932    | 1,002    |
| G03 | NM_005985 | SNAI1    | 7,793    | 7,097    | 0,005  | 0,007  | 0,617    | 0,025    | -1,620   |
| G04 | NM_003107 | SOX4     | 4,271    | 3,491    | 0,052  | 0,089  | 0,582    | 0,018    | -1,717   |
| G05 | NM_138473 | SP1      | 4,153    | 3,511    | 0,056  | 0,088  | 0,641    | 0,050    | -1,560   |
| G06 | NM_004599 | SREBF2   | 1,975    | 1,618    | 0,254  | 0,326  | 0,781    | 0,101    | -1,280   |
| G07 | NM_003238 | TGFB2    | 7,172    | 7,854    | 0,007  | 0,004  | 1,605    | 0,060    | 1,605    |
| G08 | NM_003242 | TGFBR2   | 6,088    | 5,548    | 0,015  | 0,021  | 0,688    | 0,004    | -1,454   |
| G09 | NM_003246 | THBS1    | 4,133    | 3,357    | 0,057  | 0,098  | 0,584    | 0,140    | -1,713   |
| G10 | NM_003810 | TNFSF10  | 9,938    | 12,317   | 0,001  | 0,000  | 5,204    | 0,057    | 5,204    |
| G11 | NM_006472 | TXNIP    | 4,158    | 5,807    | 0,056  | 0,018  | 3,136    | 0,083    | 3,136    |
| G12 | NM_003376 | VEGFA    | 3,273    | 4,656    | 0,103  | 0,040  | 2,609    | 0,011    | 2,609    |
| H01 | NM_001101 | ACTB     | -4,215   | -4,409   | 18,567 | 21,245 | 0,874    | 0,008    | -1,144   |
| H02 | NM_004048 | B2M      | 2,224    | 2,322    | 0,214  | 0,200  | 1,070    | 0,275    | 1,070    |
| H03 | NM_002046 | GAPDH    | -2,566   | -2,633   | 5,921  | 6,202  | 0,955    | 0,682    | -1,048   |
| H04 | NM_000194 | HPRT1    | 4,651    | 4,080    | 0,040  | 0,059  | 0,673    | 0,000    | -1,485   |
| H05 | NM_001002 | RPLP0    | -4,309   | -3,769   | 19,824 | 13,635 | 1,454    | 0,004    | 1,454    |

Listed here are the complete data from the Qiagen® PAHS-235ZA (Cat. No. 330231). The analysis includes n=3 independent mounts of iPSC ACVRL1<sup>wt/wt</sup> and iPSC ACVRL1<sup>wt/mut</sup>, respectively. Regulation is expressed as change in expression of iPSC ACVRL1<sup>wt/mut</sup> compared with iPSC ACVRL1<sup>wt/wt</sup>. Index of abbreviations within the measurement values: n. d.: not detectable; no s.p.: no statement possible; s. i.: sometimes induced; to l. v.: to less values. Abbreviations of symbols in alphabetical order: ACTA2: Actin, alpha 2, smooth muscle, aorta; ACTB: Actin, beta; ACVR1: Activin A receptor, type I; ACVRL1: Activin A receptor type II-like 1; AGT: Angiotensinogen (serpin peptidase inhibitor, clade A, member 8); AIPL1: Aryl hydrocarbon receptor interacting protein-like 1; AR: Androgen receptor; ATF: Activating transcription factor (3, 4 (tax-responsive enhancer element B67)); B2M: Beta-2-microglobulin; BACH1: BTB and CNC homology 1, basic leucine zipper transcription factor 1; BCL2L1: BCL2L1 BCL2-like 1; BDNF: Brain-derived neurotrophic factor; BHLHE40: Basic helix-loop-helix family, member e40; BRD2: Bromodomain containing 2; CDC6: Cell division cycle 6 homolog (*S. cerevisiae*); CDKN1B: Cyclin-dependent kinase inhibitor 1B (p27, Kip1); CEBPB: CCAAT/enhancer binding protein (C/EBP), beta; CREB1: CAMP responsive element binding protein 1; CREBBP: CREB binding protein; CRYAB: Crystallin, alpha B; CTNNA1: Catenin (cadherin-associated protein), beta 1, 88kDa; DNAJA1: DnaJ (Hsp40) homolog, subfamily A, member 1; E2F4: E2F transcription factor 4, p107/p130-binding; EMP1:

Epithelial membrane protein 1; ENG: Endoglin; EP300: E1A binding protein p300; EPHB2: EPH receptor B2; FN1: Fibronectin 1; FOS: FBJ murine osteosarcoma viral oncogene homolog; FURIN: Furin (paired basic amino acid cleaving enzyme); GADD45B: Growth arrest and DNA-damage-inducible, beta; GAPDH: Glyceraldehyde-3-phosphate dehydrogenase; GLI2: GLI family zinc finger 2; GTF2I: General transcription factor Iii; HERPUD1: Homocysteine-inducible, endoplasmic reticulum stress-inducible, ubiquitin-like domain member 1; HES1: Hairy and enhancer of split 1, (Drosophila); HEY1: Hairy/enhancer-of-split related with YRPW motif 1; HMOX1: Heme oxygenase (decycling) 1; HPRT1: Hypoxanthine phosphoribosyltransferase 1; ID: Inhibitor of DNA binding (1, 2, 3) dominant negative helix-loop-helix protein; IFRD1: Interferon-related developmental regulator 1; IL10: IL10 Interleukin 10; KLF10: Kruppel-like factor 10; MAP3K7: Mitogen-activated protein kinase kinase kinase 7; MAPK: Mitogen-activated protein kinase (14, 8); MBD1: Methyl-CpG binding domain protein 1; MMP2: Matrix metalloproteinase 2 (gelatinase A, 72kDa gelatinase, 72kDa type IV collagenase); MSX2: Msh homeobox 2; MYC: V-myc myelocytomatosis viral oncogene homolog (avian); MYOD1: Myogenic differentiation 1; NFIB: Nuclear factor I/B; NFKBIA: Nuclear factor of kappa light polypeptide gene enhancer in B-cells inhibitor, alpha; NOTCH1: Notch 1; PDGFA: Platelet-derived growth factor alpha polypeptide; PLG: Plasminogen; PPARA: Peroxisome proliferator-activated receptor alpha; PTGS2: Prostaglandin-endoperoxide synthase 2 (prostaglandin G/H synthase and cyclooxygenase); PTHLH: Parathyroid hormone-like hormone; PTK2: PTK2 protein tyrosine kinase 2; PTK2B: PTK2B protein tyrosine kinase 2 beta; RAD21: RAD21 homolog (S. pombe); RARA: Retinoic acid receptor, alpha; RBL1: Retinoblastoma-like 1 (p107); RHO: Ras homolog gene family, (A (member A), B (member B)); RPLP0: Ribosomal protein, large, P0; RUNX1: Runt-related transcription factor 1; RYBP: RING1 and YY1 binding protein; S100A8: S100 calcium binding protein A8; SERPINE1: Serpin peptidase inhibitor, clade E (nexin, plasminogen activator inhibitor type 1), member 1; SHH: Sonic hedgehog; SMAD: SMAD family member (1,3 5, 6); SNAI1: Snail homolog 1 (Drosophila); SOX4: SRY (sex determining region Y)-box 4; SP1: Sp1 transcription factor; SREBF2: Sterol regulatory element binding transcription factor 2; TGFB2: Transforming growth factor, beta 2; TGFBR2: Transforming growth factor, beta receptor II (70/80kDa); THBS1: Thrombospondin 1; TNFSF10: Tumor necrosis factor (ligand) superfamily, member 10; TXNIP: Thioredoxin interacting protein; VEGFA: Vascular endothelial growth factor A

ALK1

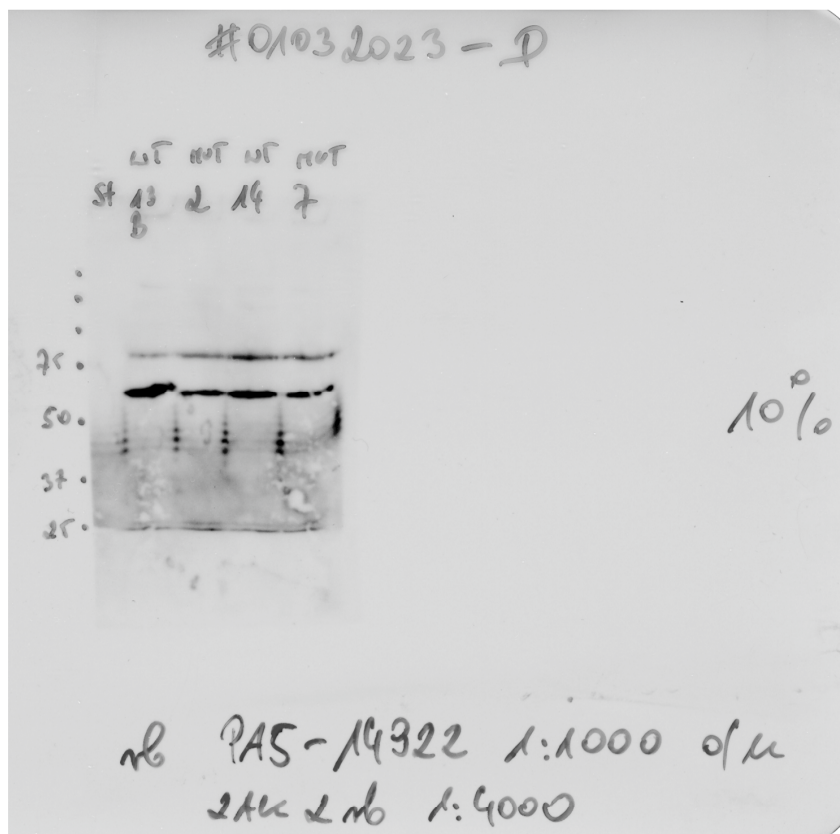

GAPDH

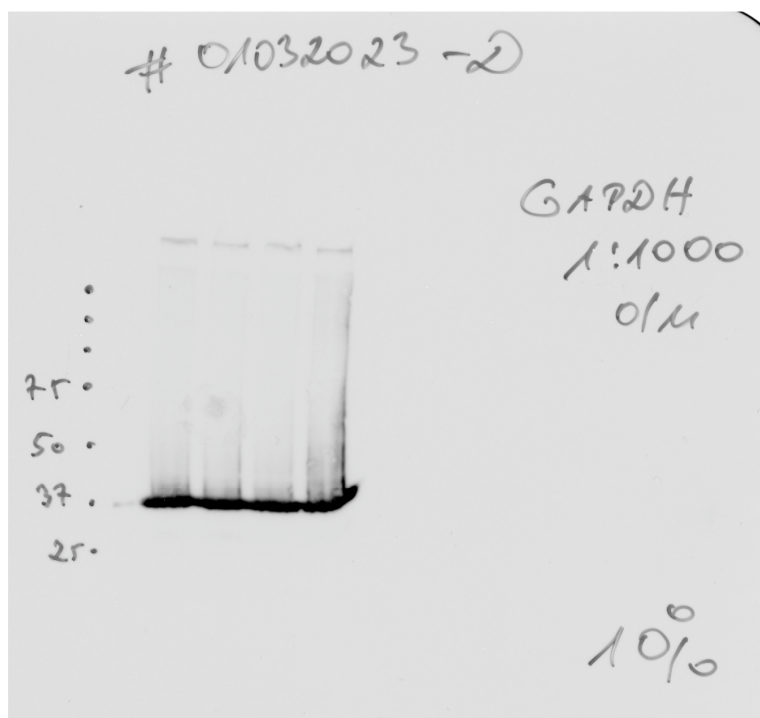



TGF-beta 1

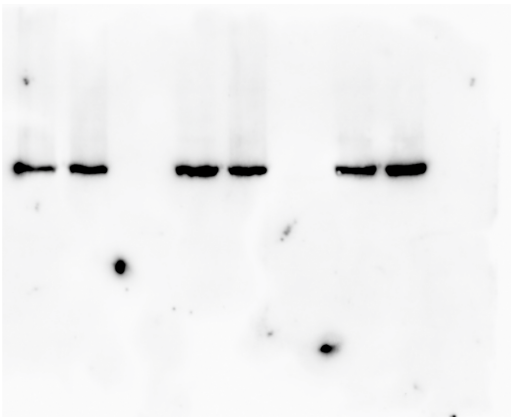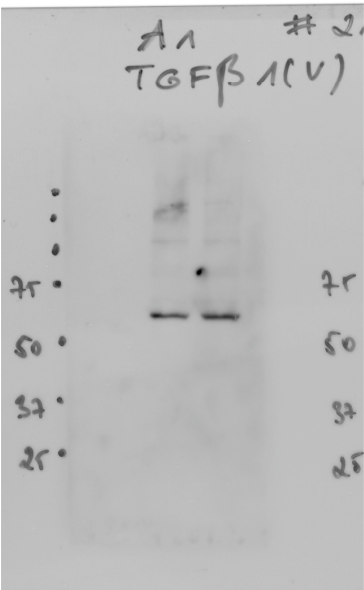

GAPDH

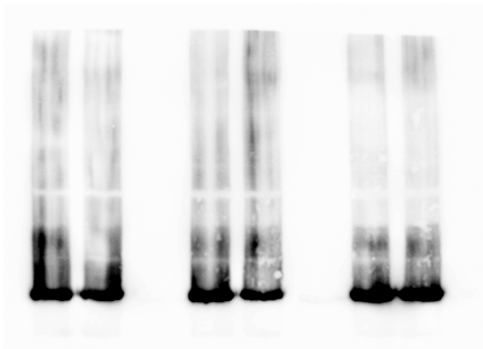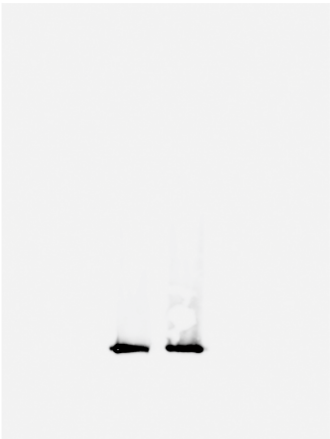

SMAD4

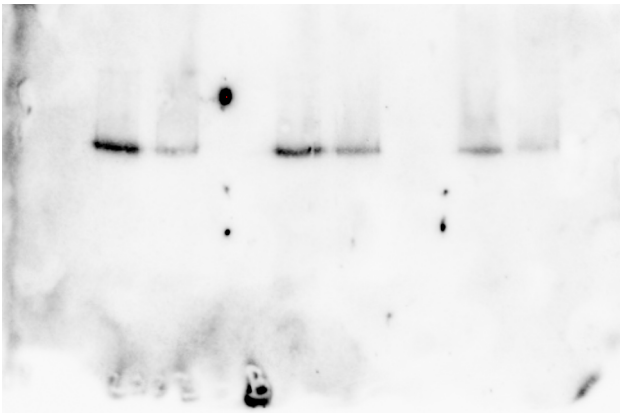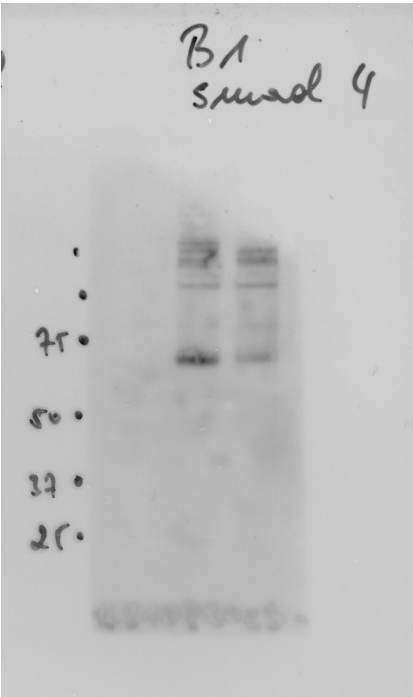

GAPDH

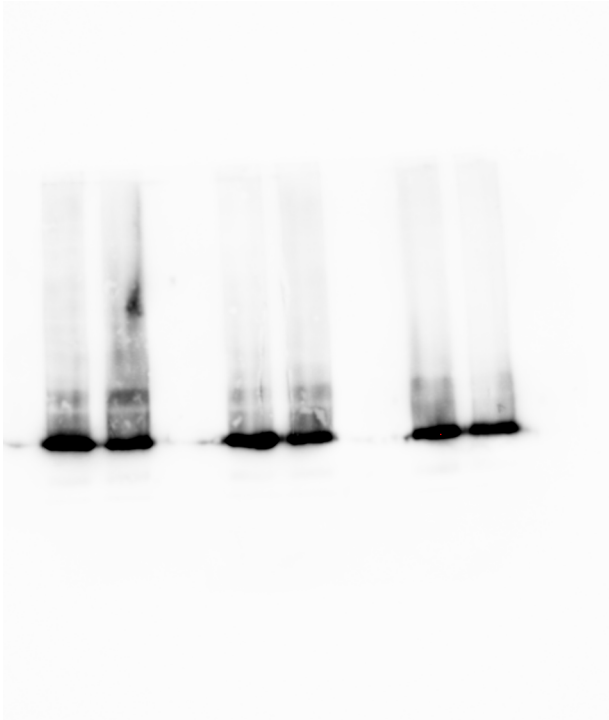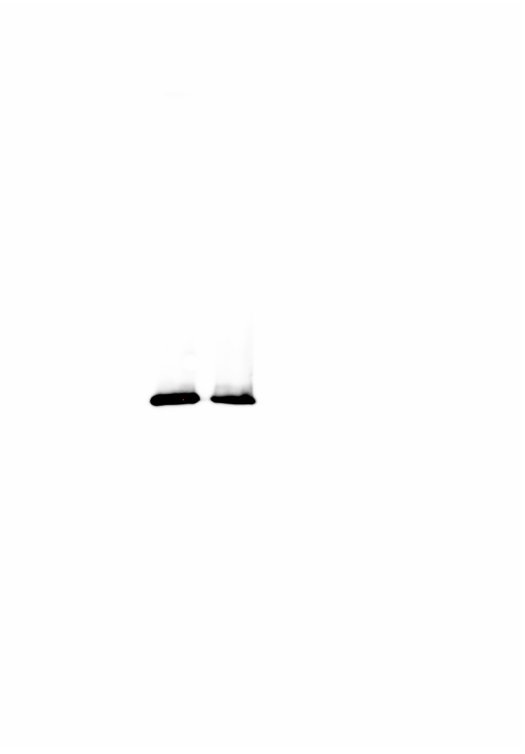

Supplement: s1 [file s1]
